# Supplementary material for: Preparation of a one-dimensional nanorod/metal organic framework Janus nanoplatform via side-specific growth for synergistic cancer therapy
Source: Royal Society of Chemistry journal article supplement (doi:10.1039/c8bm01591k), 2019-01-01
Supplement: c8bm01591k1.pdf [file c8bm01591k1.pdf]

Journal Name

ARTICLE

## Supporting information

### Preparation of One Dimensional Nanorod/Metal Organic Framework Janus Nanoplatfrom via Side-specific Growth for Synergistic Cancer Therapy

Haipeng Zhang, Qin Zhang, Chunshui Liu and Bing Han\*

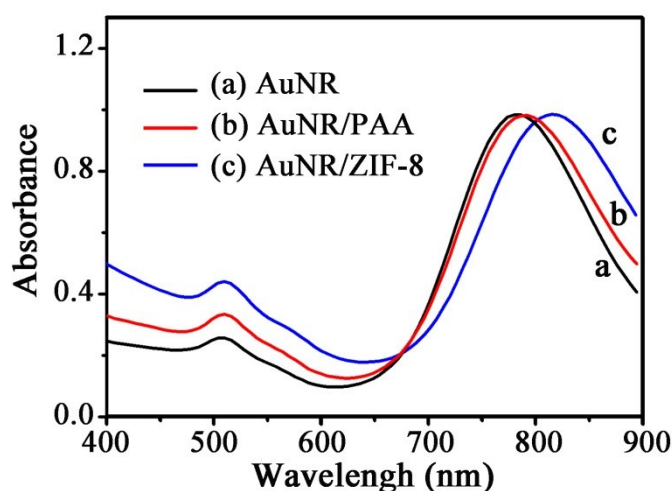

Figure S1. UV-Vis spectra of AuNR, AuNR/PAA JNPs and AuNR/ZIF-8 JNPs.

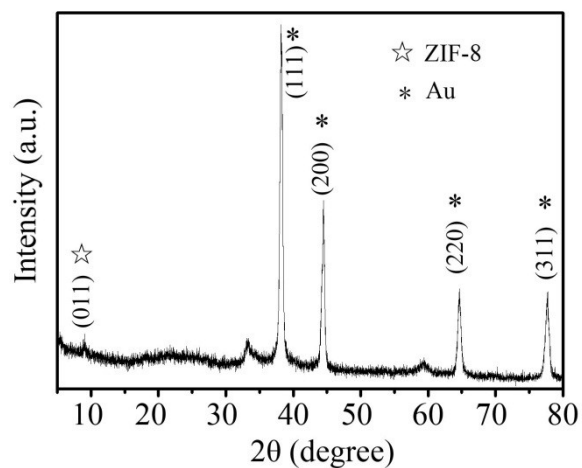

Figure S2. XRD pattern of LA-AuNR/ZIF-8 JNPs.

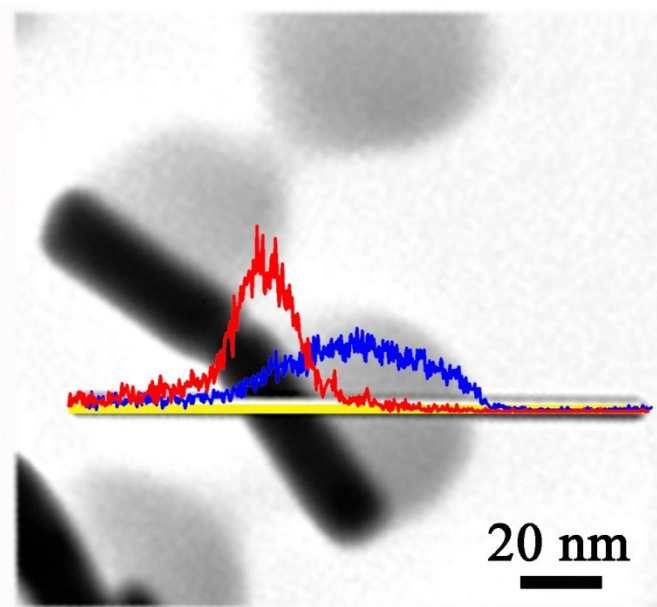

Figure S3. Elemental line scan of a single AuNR/ZIF-8 JNP.

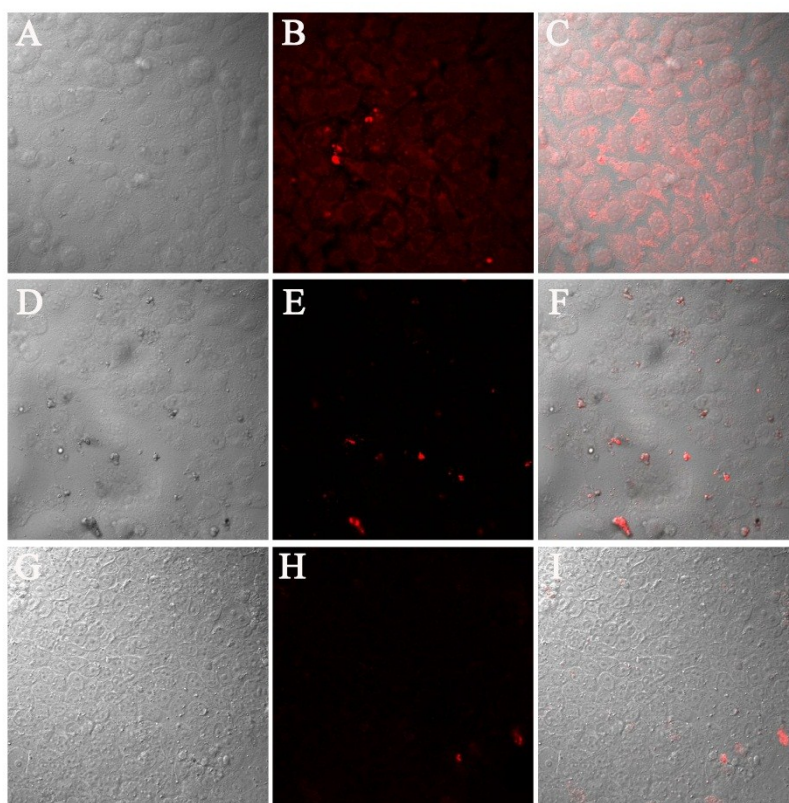

Figure S4. Confocal laser scanning microscopy (CLSM) images of HepG-2 cells treated with (A-C) DOX loaded LA-AuNR/ZIF-8 JNPs, and (D-F) DOX loaded AuNR/ZIF-8 JNPs for 3 h. (G-I) MCF-7 cells treated with DOX loaded LA-AuNR/ZIF-8 JNPs for 3 h.

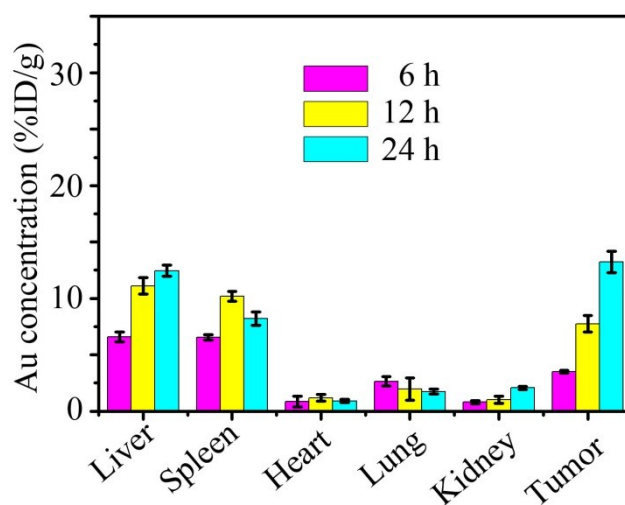

Figure S5. Quantitative measurement of Au concentrations in main organs (liver, spleen, heart, lung, kidney and tumor) of the mice after injection of LA-AuNR/ZIF-8 JNPs for 6, 12 and 24 h.

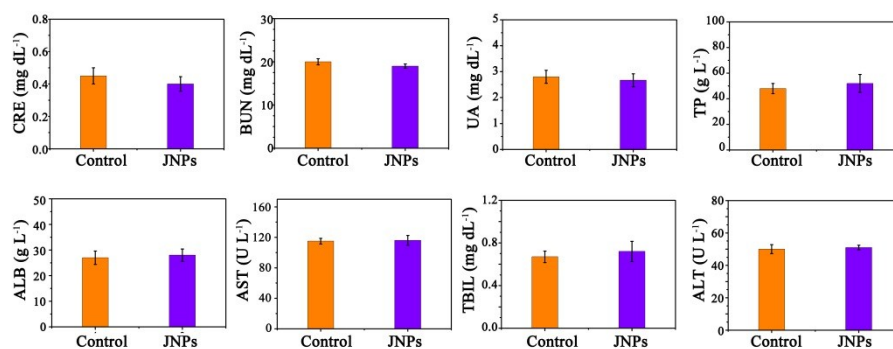

Figure S6. Blood analysis for the mice treated with PBS (control) and LA-AuNR/ZIF-8 JNPs.
